# Supplementary material
Source: MDPI journal article supplement (https://www.mdpi.com/2075-4701/7/4/108)
Supplement: s1 [file s1 › metals-07-00108-g001.pdf]

$$N = 1/2$$

$$\uparrow \int \Delta \sigma$$

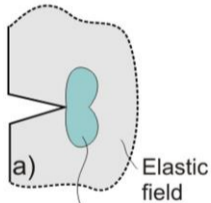

Monotonic  
Plastic Zone

$$N = 1$$

$$\uparrow \downarrow \Delta \sigma$$

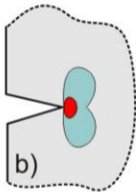

Cyclic  
Plastic Zone

$$N = 2$$

$$\uparrow \downarrow \uparrow \downarrow \Delta \sigma$$

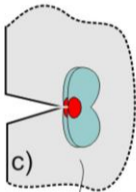

Shifting Plastic Zone  
(with progressing  
crack tip)

$$N = Z$$

$$\uparrow \downarrow \Delta \sigma$$

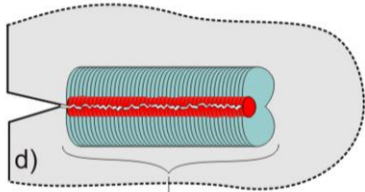

Plastically strained material at both crack  
flanks, in the wake of crack growth
