# Supplementary material
Source: MDPI journal article supplement (https://www.mdpi.com/2075-4701/7/4/108)

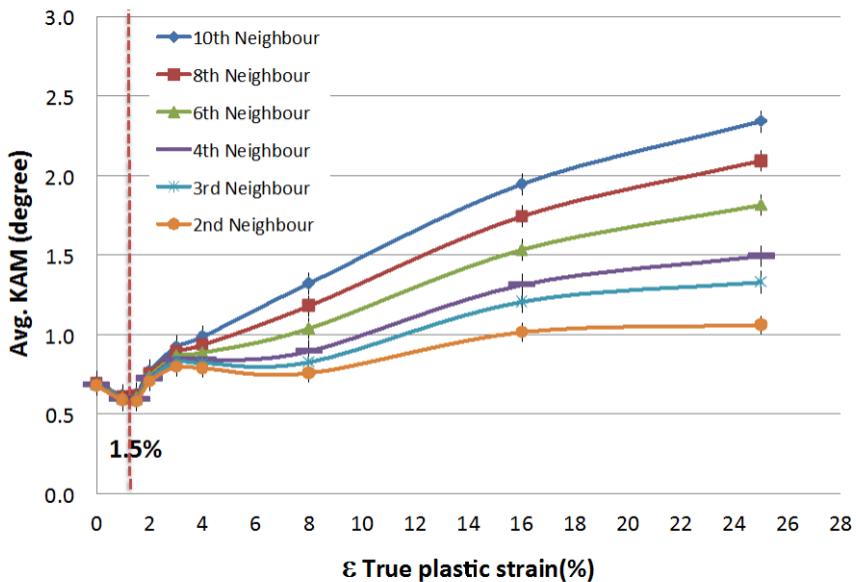

Supplement: s1 [file s1 › metals-07-00108-g006.pdf]

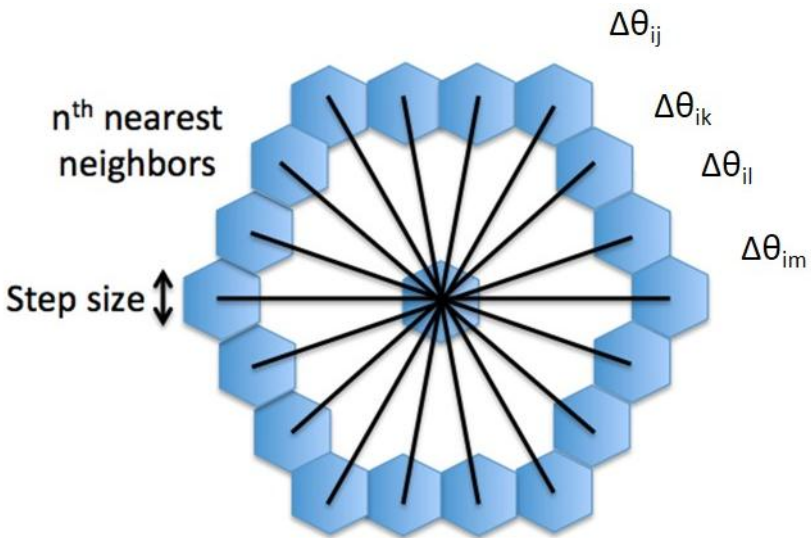

Supplement: s1 [file s1 › metals-07-00108-g002.pdf]

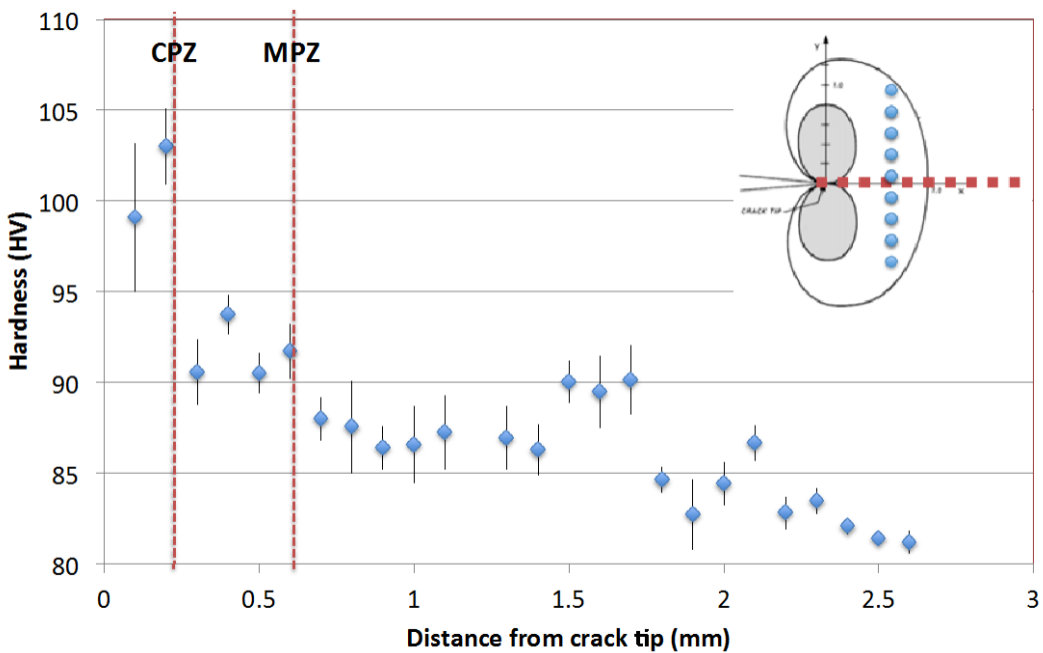

Supplement: s1 [file s1 › metals-07-00108-g003.pdf]

**a?**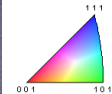**b?**60  $\mu\text{m}$ **c?**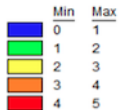60  $\mu\text{m}$

Supplement: s1 [file s1 › metals-07-00108-g004.pdf]

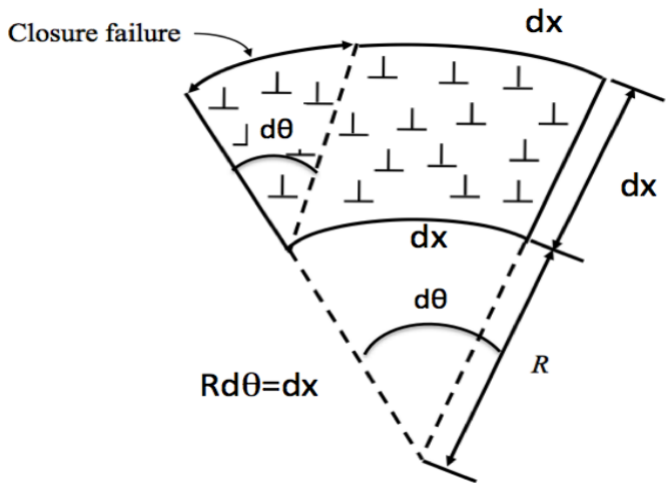

Supplement: s1 [file s1 › metals-07-00108-g005.pdf]
